# Supplementary material for: Hybrid interaction network of guanidinium–biphenyldisulfonic acid for the structure determination of liquid molecules
Source: Royal Society of Chemistry journal article supplement (doi:10.1039/d2ce00228k), 2022-01-01
Supplement: d2ce00228k1.pdf [file d2ce00228k1.pdf]

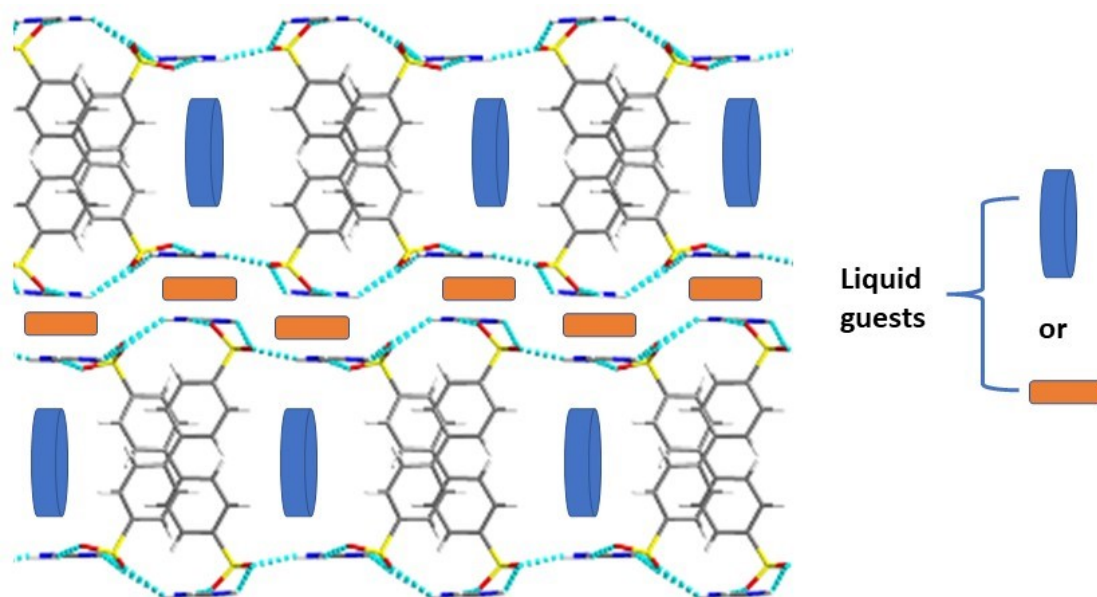

Guanidinium-biphenyldisulfonic acid (GBPS) were used as a coformer for the co-crystallization of liquid compounds **1-8** and get their structures determined by single crystal X-ray diffraction.
